# Supplementary material for: Effect of Nitrogen on the Corrosion Resistance of 6Mo Super Austenitic Stainless Steel
Source: MDPI journal article supplement (doi:10.3390/met14040391), 2024-03-26
Supplement: s1 [file s1]

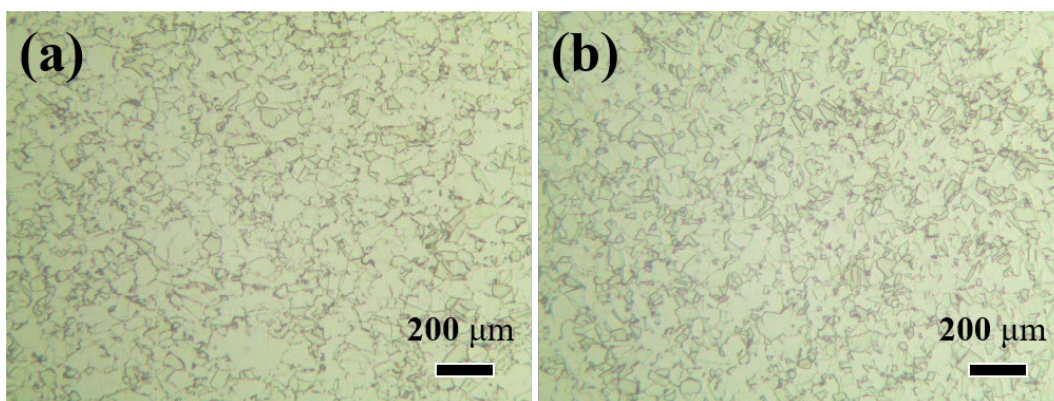

**Fig. S1.** The OM observation of 0.2N (a) and 0.4N (b) hot-rolled alloys.

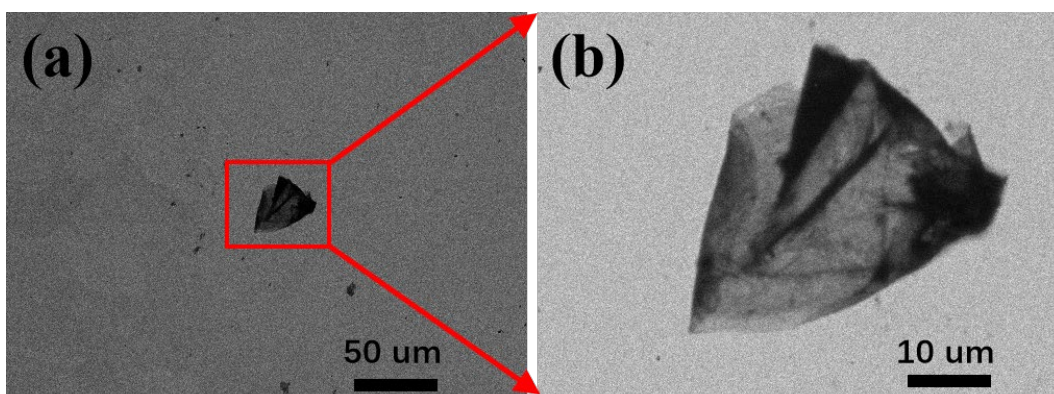

**Figure S2.** Corrosion morphology after potentiodynamic polarization test in 3.5% NaCl with pH=1.

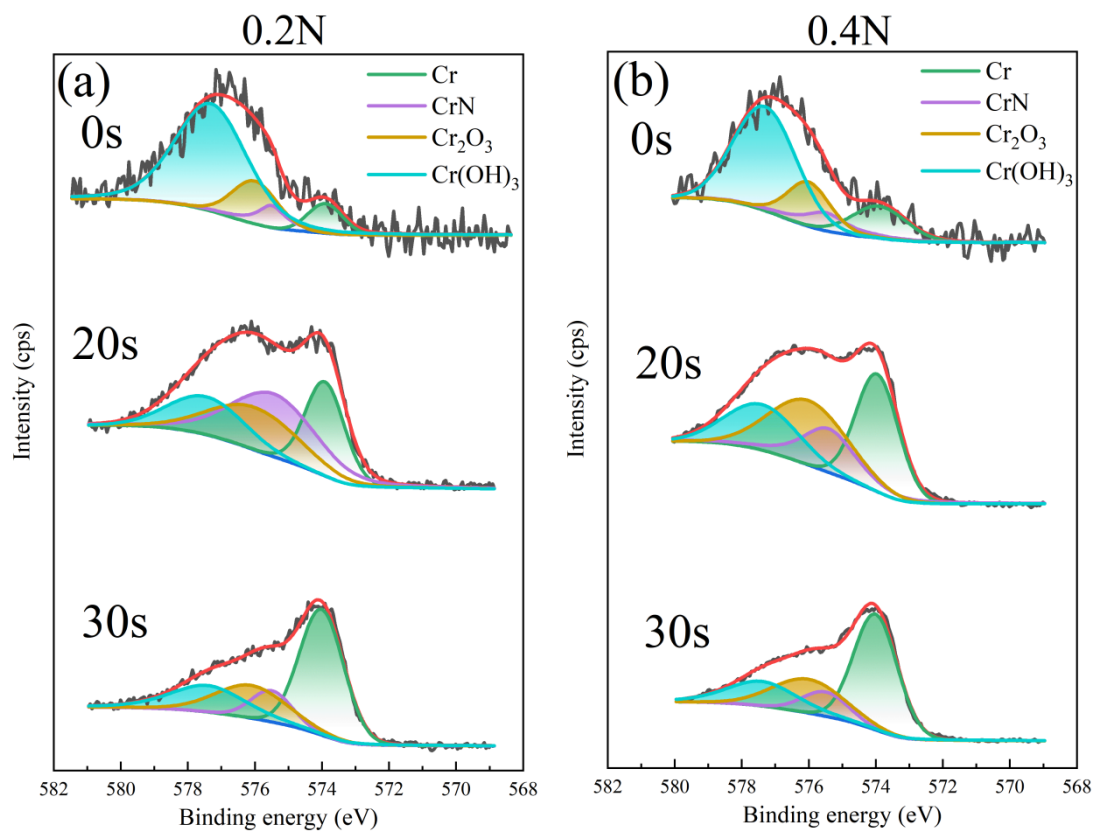

**Figure S3.** The change of Cr 2p spectra of 0.2N-ST (a) and 0.4N-ST (b) samples with sputtering time.

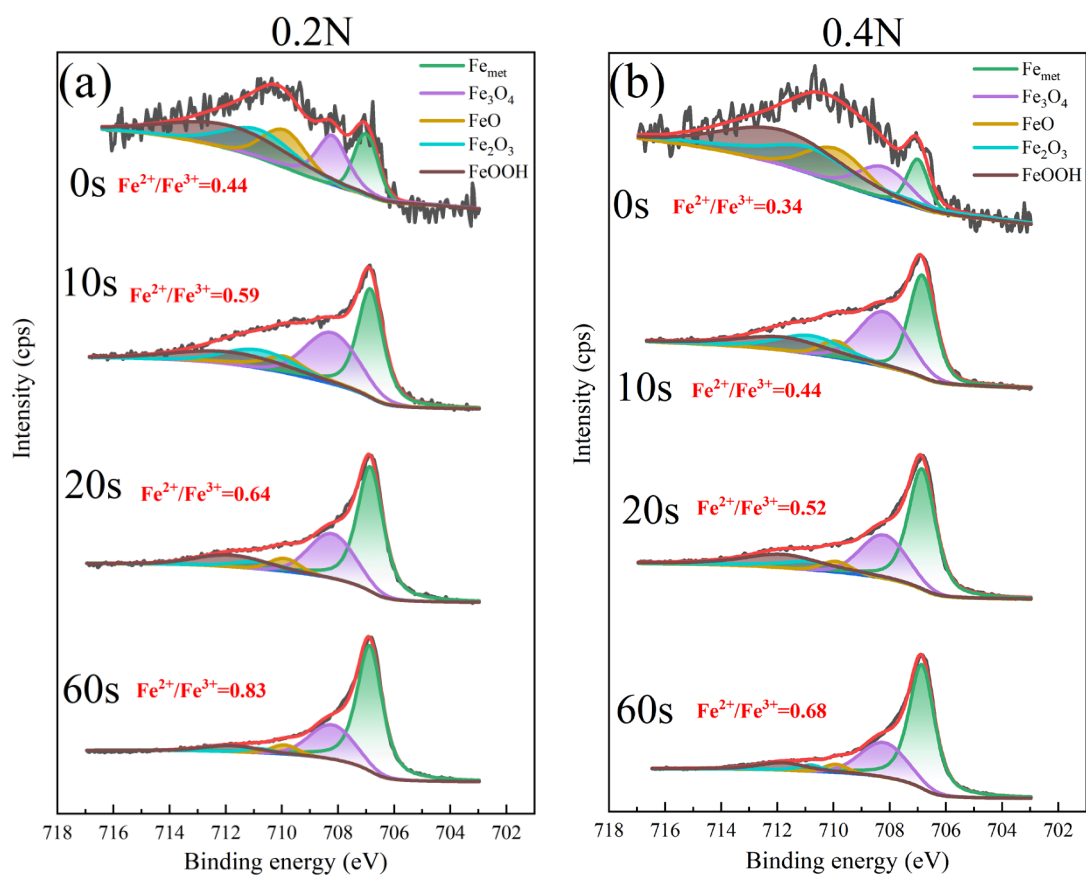

**Figure S4.** The change of Fe 2p spectra of 0.2N-ST (a) and 0.4N-ST (b) samples with sputtering time.

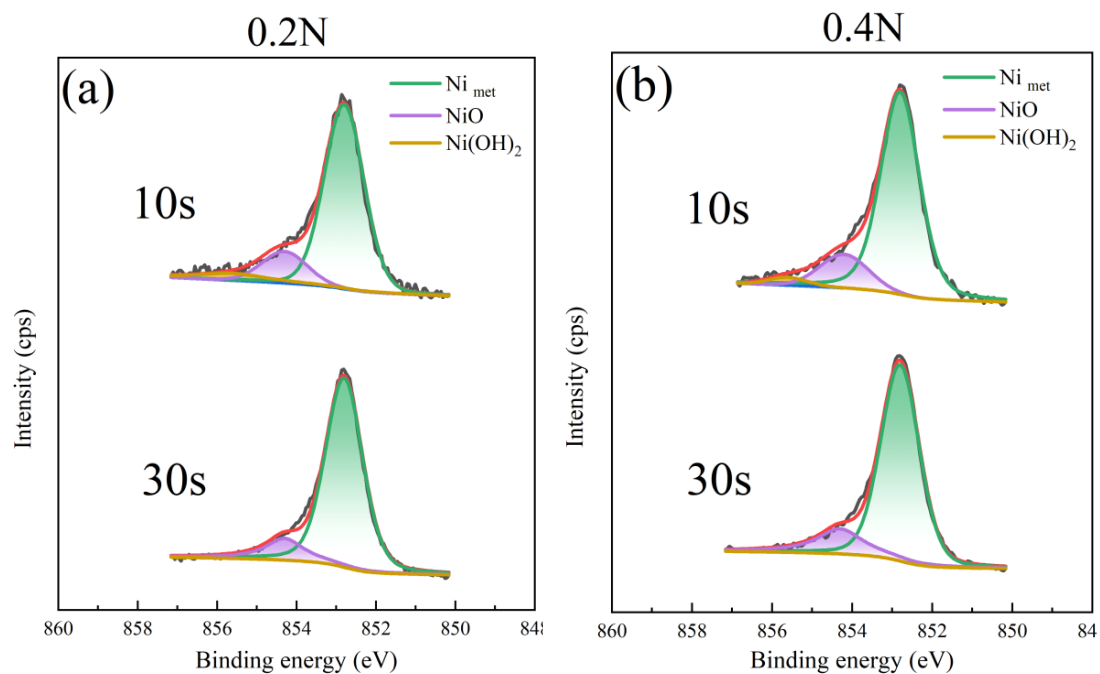

**Figure S5.** The change of Ni 2p spectra of 0.2N-ST (a) and 0.4N-ST (b) samples with sputtering time.
